# Supplementary material for: Inside Honeybee Hives: Impact of Natural Propolis on the Ectoparasitic Mite Varroa destructor and Viruses
Source: Insects. 2017 Feb 6;8(1):15. doi: 10.3390/insects8010015 (PMC5371943; doi:10.3390/insects8010015)
Supplement: Supplementary file 1 [file insects-08-00015-s001.xlsx]

## Sheet: Tabelle1
Colony	Month	Propolis treatment	Natural mite fall/day	V. destructor infestation rate I (daily mite fall/colony stregth)	V. destructor infestation rate II (alcohol washing; mites/100 bees)	Resin collection (g)	Comment
2	2013-07-01	high	4.2	0.138466	1	61
3	7/2013	high	5.6	0.318734	1.33333	60
8	7/2013	high	0.6	0.0464091	0	21
9	7/2013	high	5	0.192234	1	40
10	7/2013	high	0	0.01	0	8
1	7/2013	low	0.6	0.042092	0	35
4	7/2013	low	0.4	0.02	0	7
5	7/2013	low	2	0.335177	2.33333	10
6	7/2013	low	0.4	0.0262312	0	10
7	7/2013	low	6	0.274236	2	31
2	8/2013	high	51.875	1.98083	0.333333	81
3	8/2013	high	33.25	1.35543	2.33333	83
8	8/2013	high	1.375	0.0648096	0	17
9	8/2013	high	54.75	1.85571	3	77
10	8/2013	high	0.2	0.01	0	9
1	8/2013	low	1.625	0.0644995	0	16
4	8/2013	low	0.375	0.0240685	4.66667	8
5	8/2013	low	4.875	0.282805	0.333333	10
6	8/2013	low	4.75	0.199011	0	14
7	8/2013	low	36.375	1.35467	2.66667	33
2	9/2013	high	86.7143	3.31116	NA	36	Alcohol washing was not performed as all colonies received a thymol based acaricide treatment in the beginning of September.
3	9/2013	high	40.8571	1.66553	NA	44
8	9/2013	high	1	0.0471342	NA	21
9	9/2013	high	75	2.54207	NA	20
10	9/2013	high	0.428571	0.020521	NA	6
1	9/2013	low	3.42857	0.136087	NA	6
4	9/2013	low	2	0.128366	NA	15
5	9/2013	low	8.57143	0.49724	NA	15
6	9/2013	low	9	0.377074	NA	14
7	9/2013	low	42	1.56416	NA	47
Numbers in "Colony" represent colony identity (colonies 1 - 10)
Propolis treatment: high = added propolis; low = propolis removed
Varroa destructor infestation rate I = data of natural mite fall (average mite fall on bottom boards per day) relative to colony strength. Mites on boards were counted every 24 hours over a time period of 10 days
V. destructor infestation rate II = data from alcohol washing method (mites obtained for a total 300 bees per colony)
Resin collection = amount of resin collected and deposited on propolis grids by each colony (which was removed from low propolis treatment colonies and added to high propolis treatment colonies)
